# Supplementary material
Source: publisher site journal article supplement (https://www.dovepress.com/article/372158)
Supplement: Supplementary file 1 [file get_supplementary_file.php]

**Table S1 The sizes of left** **ventricular aneurysm**

| **The maximum diameter of LVAs (mm)** | **The number of cases** |
| --- | --- |
| <20 | 12 |
| 20-29 | 81 |
| 30-39 | 73 |
| 40-49 | 25 |
| ≥50 | 9 |

LVA, left ventricular aneurysm

**Table S2** **The** **characteristics of** **coronary vessel lesions**

| **Coronary vessel lesions** | **Non-LVAs group (n=288) n(%)** | **LVAs group (n=188) n(%)** | ***P* value** | **Training set (n=332) n(%)** | **Validation set (n=144) n(%)** | ***P* value** |
| --- | --- | --- | --- | --- | --- | --- |
| **One-vessel lesion** |  |  | <0.001 |  |  | 0.638 |
| RCA | 11(3.82) | 0 |  | 8(2.41) | 3(2.08) |  |
| LAD | 27(9.38) | 41(21.81) |  | 48(14.46) | 20(13.89) |  |
| LCx | 12(4.17) | 1(0.53) |  | 11(3.31) | 2(1.39) |  |
| **Two-vessel lesions** |  |  | 0.095 |  |  | 0.011 |
| LM+RCA | 1(0.35) | 2(1.06) |  | 2(0.60) | 1(0.69) |  |
| LM+LAD | 0 | 1(0.53) |  | 0 | 1(0.69) |  |
| RCA+LAD | 28(9.72) | 27(4.36) |  | 31(9.34) | 24(16.67) |  |
| RCA+LCx | 11(3.82) | 2(1.06) |  | 7(2.11) | 6(4.17) |  |
| LAD+LCx | 33(11.46) | 25(13.30) |  | 47(14.16) | 11(7.64) |  |
| **Three-vessel lesions** |  |  | 0.058 |  |  | 0.664 |
| LM+RCA+LAD | 3(1.04) | 1(0.53) |  | 3(0.90) | 1(0.69) |  |
| LM+RCA+LCx | 10(3.47) | 0 |  | 8(2.41) | 2(1.39) |  |
| LM+LAD+LCx | 3(1.04) | 3(1.60) |  | 3(0.90) | 3(2.08) |  |
| RCA+LAD+LCx | 121(42.01) | 66(35.11) |  | 131(39.46) | 56(38.89) |  |
| **Four-vessel lesions** |  |  |  |  |  |  |
| LM+RCA+LAD+  LCx | 28(9.72) | 19(10.11) |  | 33(9.94) | 14(9.72) |  |

LVA, left ventricular aneurysm; RCA, right coronary artery; LAD, left anterior descending artery; LCx, left circumflex artery; LM, left main

**Table S3** **The** **characteristics** **of ECG leads in STEMI patients**

| **Sites of ECG leads** | **Non-LVAs group (n=160) n(%)** | **LVAs group (n=172) n(%)** | **Training set (n=236) n(%)** | **Validation set (n=96) n(%)** |
| --- | --- | --- | --- | --- |
| V1-V3 | 25(15.63) | 22(12.79) | 35(14.83) | 12(12.50) |
| V3-V5 | 22(13.75) | 47(27.33) | 46(19.49) | 23(23.96) |
| V1-V5, aVL, I | 25(15.63) | 70(40.70) | 65(27.54) | 30(31.25) |
| aVL, I | 4(2.50) | 0 | 3(1.27) | 1(1.04) |
| II, III, aVF | 57(35.63) | 5(2.91) | 43(18.22) | 19(19.79) |
| V1-V3; II, III, aVF | 3(1.88) | 5(2.91) | 6(2.54) | 2(2.08) |
| V3-V5; aVL, I | 1(0.63) | 0 | 1(0.42) | 0 |
| V3-V5; II, III, aVF | 3(1.88) | 10(5.81) | 9(3.81) | 4(4.17) |
| V1-V5, aVL, I; II, III, aVF | 5(3.13) | 10(5.81) | 13(5.51) | 2(2.08) |
| aVL, I; II, III, aVF | 1(0.63) | 1(0.58) | 1(0.42) | 1(1.04) |
| aVL, I; V7-V9 | 1(0.63) | 0 | 0 | 1(1.04) |
| II, III, aVF; V7-V9 | 13(8.13) | 2(1.16) | 14(5.93) | 1(1.04) |

ECG, electrocardiogram; LVA, left ventricular aneurysm

**Table S4 The characteristics** **of seven selected variables of patients in LVAs set and non-LVAs set**

| **Variables** | **LVAs set**  **(N=202)** | **Non-LVAs set (N=307)** | ***P* value** |
| --- | --- | --- | --- |
| **Age, n(%)** |  |  | <0.001 |
| <65 | 25 (12.38) | 176 (57.33) |  |
| ≥65 | 177 (87.62) | 131 (42.67) |  |
| **History of cardiovascular disease, n(%)** |  |  | 0.004 |
| yes | 43(21.29) | 36(11.73) |  |
| no | 159(78.71) | 271(88.27) |  |
| **LVEF, n(%)** |  |  | <0.001 |
| <40 | 72(35.64) | 32(10.42) |  |
| 40-49 | 110(54.46) | 87(28.34) |  |
| ≥50 | 20(9.90) | 188(61.24) |  |
| **ST-segment elevation, n(%)** |  |  | <0.001 |
| yes | 172(85.15) | 160(52.12) |  |
| no | 30(14.85) | 147(47.88) |  |
| **History of PCI, n(%)** |  |  | 0.165 |
| yes | 16(7.92) | 36(11.73) |  |
| no | 186(92.08) | 271(88.27) |  |
| **MPV, fL** | 11.00±1.24 | 10.90±1.38 | 0.397 |
| **AST, U/L** | 166.44±185.86 | 86.76±115.07 | <0.001 |

LVAs, left ventricular aneurysms; LVEF, left ventricular ejection fraction; PCI, percutaneous coronary intervention; MPV, mean platelet volume; AST, aspartate aminotransferase
